# Supplementary material for: MHC-correlated odour preferences in humans and the use of oral contraceptives
Source: PubMed Central journal article supplement (PMC2605820; doi:10.1098/rspb.2008.0825), 2008-08-12

## ELECTRONIC SUPPLEMENTARY MATERIAL

*Roberts S.C., Gosling L.M., Carter V. & Petrie M. (2008)*  
*MHC-correlated odour preferences in humans and the use of oral contraceptives*

**Table S1. Female participant sample size.** The control group includes women who neither used, intended to use nor actually used oral contraceptives during the study. The Pill group includes women who intended to use oral contraceptives (for Session 1) and/or actually began using them between Sessions 1 and 2. Numbers in brackets denote women who were not from the UK or from a different ethnic origin, who were excluded from certain analyses.

|                                                   | <b>Control group</b> | <b>Pill group</b> | <b>Total</b> |
|---------------------------------------------------|----------------------|-------------------|--------------|
| <b>Women tested in both sessions<sup>1</sup></b>  | 60 (8)               | 37 (4)            | 97           |
| <b>Women tested in Session 1 only<sup>2</sup></b> | 12 (4)               | 1 (1)             | 13           |
| <b>Women tested in Session 2 only<sup>2</sup></b> | 0                    | 3 (1)             | 3            |

### Footnotes

<sup>1</sup>A total of 193 women, aged 18-35, were registered as study participants, of whom 97 completed all study requirements (visited the lab for two testing sessions approximately 3 months apart; each session lasted approximately 1h and included some additional tasks such as rating faces). Of these, 60 did not use the pill and 37 began using it during the experiment.

<sup>2</sup>In addition to the 97 who completed all aspects of the study, we were also able to include in selected analyses 13 who completed the Session 1 but not Session 2 (of whom 1 expressed intention to begin pill use) and 3 who began using the pill before Session 1 (they were tested only as pill users in the between-subjects comparison of users versus non-users). In summary, total sample sizes were therefore 110 for Session 1 (all non-users), 100 for Session 2 (60 non-users, 40 pill users) and 97 for the within-subjects comparisons (60 in control group, 37 in pill group).

Twelve women were from outside the UK, or from a different ethnic origin, and were thus excluded in some analyses to control for potential differences in allele frequencies between populations (leaving 52 in the control group and 33 in the pill group). 5 of the 13 who completed only Session 1 were from outside the UK (including the one who expressed intention to begin pill use), as was 1 of the 3 women who were tested only as pill users.

**Table S2. Relative frequencies of MHC alleles at A, B and DRB1 loci.**

| <b>HLA Locus</b> | <b>Allele number</b> | <b>Relative frequency (Females)</b> | <b>Relative frequency (Males)</b> |
|------------------|----------------------|-------------------------------------|-----------------------------------|
| <b>A</b>         | 1                    | 18.18                               | 15.45                             |
|                  | 2                    | 28.64                               | 23.64                             |
|                  | 3                    | 14.55                               | 13.64                             |
|                  | 11                   | 6.36                                | 4.55                              |
|                  | 23                   | 2.73                                | 3.64                              |
|                  | 24                   | 10                                  | 8.18                              |
|                  | 25                   | 2.73                                | 0.45                              |
|                  | 26                   | 2.73                                | 3.64                              |
|                  | 29                   | 2.73                                | 4.09                              |
|                  | 30                   | 1.82                                | 2.73                              |
|                  | 31                   | 2.73                                | 1.36                              |
|                  | 32                   | 1.36                                | 4.09                              |
|                  | 33                   | 0.91                                | 0.45                              |
|                  | 68                   | 4.09                                | 2.27                              |
|                  | 69                   | 0.45                                | 0                                 |
|                  | <b>B</b>             | 7                                   | 18.64                             |
| 8                |                      | 14.09                               | 12.73                             |
| 13               |                      | 3.18                                | 0.91                              |
| 14               |                      | 1.36                                | 1.36                              |
| 15               |                      | 0.45                                | 0                                 |
| 18               |                      | 3.64                                | 2.27                              |
| 27               |                      | 3.18                                | 4.09                              |
| 35               |                      | 5.91                                | 5.91                              |
| 37               |                      | 0.91                                | 0.45                              |
| 38               |                      | 3.18                                | 3.18                              |
| 39               |                      | 1.82                                | 1.36                              |
| 41               |                      | 0                                   | 0.45                              |
| 42               |                      | 0                                   | 0.45                              |
| 44               |                      | 14.09                               | 16.82                             |
| 45               |                      | 0.91                                | 0.45                              |
| 47               |                      | 0.45                                | 0                                 |
| 49               |                      | 0.91                                | 1.82                              |
| 50               |                      | 0.91                                | 0.91                              |
| 51               |                      | 4.55                                | 5.00                              |
| 52               |                      | 1.36                                | 0.45                              |
| 53               |                      | 0.45                                | 0                                 |
| 55               |                      | 1.82                                | 1.82                              |
| 56               |                      | 0                                   | 0.91                              |
| 57               |                      | 3.18                                | 2.27                              |
| 58               |                      | 0                                   | 0.45                              |
| 60               |                      | 4.55                                | 4.09                              |
| 61               |                      | 0.45                                | 1.36                              |
| 62               | 6.36                 | 5.45                                |                                   |
| 64               | 0                    | 0.91                                |                                   |
| 65               | 2.73                 | 0.45                                |                                   |
| 71               | 0.45                 | 0                                   |                                   |
| 72               | 0.45                 | 0                                   |                                   |
| <b>DRB1</b>      | 1                    | 8.64                                | 7.27                              |
|                  | 4                    | 15.00                               | 17.73                             |
|                  | 5                    | 0.45                                | 0                                 |
|                  | 6                    | 0.45                                | 0                                 |

|  |     |       |       |
|--|-----|-------|-------|
|  | 7   | 15.45 | 15.45 |
|  | 8   | 1.82  | 1.36  |
|  | 10  | 0.45  | 0     |
|  | 11  | 8.64  | 7.73  |
|  | 12  | 1.82  | 0.45  |
|  | 13  | 9.55  | 9.55  |
|  | 14  | 0.45  | 1.82  |
|  | 15  | 20    | 11.36 |
|  | 16  | 0     | 0.91  |
|  | 17  | 13.64 | 13.18 |
|  | 52  | 0     | 0.45  |
|  | 53  | 0.45  | 0     |
|  | 103 | 3.18  | 0.91  |

**Table S3. Mean scores given to 3 MHC-similar and 3 MHC-dissimilar male odours in Session 2 by either normally-cycling or pill-using women.**

| Measure                                    | Mean $\pm$ s.e. |                 | Paired $t$ | $df$ | $P$   |
|--------------------------------------------|-----------------|-----------------|------------|------|-------|
|                                            | Similar         | Dissimilar      |            |      |       |
| <i>Normally cycling women, all shirts</i>  |                 |                 |            |      |       |
| Pleasantness                               | 3.85 $\pm$ 0.11 | 3.87 $\pm$ 0.10 | 0.12       | 59   | 0.909 |
| Desirability                               | 3.51 $\pm$ 0.12 | 3.61 $\pm$ 0.12 | 0.62       | 59   | 0.538 |
| Intensity                                  | 4.15 $\pm$ 0.12 | 4.30 $\pm$ 0.12 | 0.97       | 59   | 0.336 |
| <i>Normally cycling women, core sample</i> |                 |                 |            |      |       |
| Pleasantness                               | 3.93 $\pm$ 0.13 | 3.93 $\pm$ 0.14 | 0.0        | 48   | 1.0   |
| Desirability                               | 3.67 $\pm$ 0.16 | 3.68 $\pm$ 0.15 | 0.02       | 48   | 0.987 |
| Intensity                                  | 4.02 $\pm$ 0.16 | 4.02 $\pm$ 0.17 | 0.03       | 49   | 0.975 |
| <i>Pill-using women, all shirts</i>        |                 |                 |            |      |       |
| Pleasantness                               | 4.11 $\pm$ 0.15 | 4.23 $\pm$ 0.12 | 0.68       | 39   | 0.503 |
| Desirability                               | 3.68 $\pm$ 0.15 | 3.80 $\pm$ 0.14 | 0.64       | 39   | 0.529 |
| Intensity                                  | 4.18 $\pm$ 0.16 | 4.12 $\pm$ 0.14 | 0.29       | 39   | 0.775 |
| <i>Pill-using women, core sample</i>       |                 |                 |            |      |       |
| Pleasantness                               | 4.08 $\pm$ 0.18 | 4.25 $\pm$ 0.20 | 0.67       | 30   | 0.510 |
| Desirability                               | 3.84 $\pm$ 0.23 | 3.69 $\pm$ 0.21 | 0.58       | 30   | 0.567 |
| Intensity                                  | 3.95 $\pm$ 0.22 | 4.11 $\pm$ 0.19 | 0.60       | 30   | 0.554 |

**Table S4. Mean scores given to individual male odour donors when odours were presented to MHC-similar or MHC-dissimilar women.** All women were normally cycling (data are from Session 1). The upper set of scores relates to standardized scores to control for differential use of the rating scale by female raters, while the lower set shows raw scores. Within each set, the upper 3 rows relate to all ratings, the lower 3 is restricted to ratings from the core sample of women (from UK participants and odours that were not confounded by deodorants or tobacco smoke). N=79 and 52 (the numbers of men who were scored in both the similar and dissimilar conditions).

| Measure                                                          | Mean $\pm$ s.e.    |                    | Paired <i>t</i> | <i>df</i> | <i>p</i> |
|------------------------------------------------------------------|--------------------|--------------------|-----------------|-----------|----------|
|                                                                  | Similar            | Dissimilar         |                 |           |          |
| <i>Standardised scores, All ratings</i>                          |                    |                    |                 |           |          |
| Pleasant                                                         | -0.0018 $\pm$ 0.08 | 0.0477 $\pm$ 0.08  | -0.54           | 78        | 0.588    |
| Intensity                                                        | -0.0450 $\pm$ 0.07 | -0.0100 $\pm$ 0.07 | -0.35           | 78        | 0.724    |
| Desirability                                                     | -0.0417 $\pm$ 0.07 | 0.0449 $\pm$ 0.07  | -0.93           | 78        | 0.353    |
| <i>Standardised scores, Core sample (UK women, no confounds)</i> |                    |                    |                 |           |          |
| Pleasant                                                         | -0.0632 $\pm$ 0.09 | 0.0679 $\pm$ 0.09  | -1.06           | 51        | 0.294    |
| Intensity                                                        | -0.0154 $\pm$ 0.10 | 0.0292 $\pm$ 0.09  | -0.38           | 51        | 0.703    |
| Desirability                                                     | -0.0238 $\pm$ 0.09 | 0.0135 $\pm$ 0.09  | -0.27           | 51        | 0.788    |
| <i>Raw scores, All ratings</i>                                   |                    |                    |                 |           |          |
| Pleasant                                                         | 3.97 $\pm$ 0.13    | 4.06 $\pm$ 0.12    | -0.63           | 78        | 0.531    |
| Intensity                                                        | 4.31 $\pm$ 0.13    | 4.27 $\pm$ 0.13    | 0.27            | 78        | 0.789    |
| Desirability                                                     | 3.41 $\pm$ 0.13    | 3.59 $\pm$ 0.13    | -1.22           | 78        | 0.226    |
| <i>Raw scores, Core sample (UK women, no confounds)</i>          |                    |                    |                 |           |          |
| Pleasant                                                         | 3.74 $\pm$ 0.13    | 3.94 $\pm$ 0.13    | -1.37           | 51        | 0.177    |
| Intensity                                                        | 4.21 $\pm$ 0.17    | 4.19 $\pm$ 0.15    | -0.11           | 51        | 0.915    |
| Desirability                                                     | 3.24 $\pm$ 0.16    | 3.45 $\pm$ 0.15    | -1.05           | 51        | 0.298    |

**Table S5. Odour ratings and male heterozygosity.** Mean scores and independent-samples t tests between men who were heterozygous at all 3 MHC loci and those who were homozygous for one of more loci. No comparisons were significantly different.

| Session                               | Measure                   | Zygoty                               | N      | Mean   | s.e.   | t     | df    | p     |       |
|---------------------------------------|---------------------------|--------------------------------------|--------|--------|--------|-------|-------|-------|-------|
| First                                 | <b><i>All ratings</i></b> |                                      |        |        |        |       |       |       |       |
|                                       | Pleasantness              | Het                                  | 73     | 0.007  | 0.06   | 0.20  | 93    | 0.838 |       |
|                                       |                           | Hom                                  | 22     | -0.018 | 0.11   |       |       |       |       |
|                                       | Intensity                 | Het                                  | 73     | -0.023 | 0.05   | -1.20 | 93    | 0.232 |       |
|                                       |                           | Hom                                  | 22     | 0.111  | 0.10   |       |       |       |       |
|                                       | Desirability              | Het                                  | 73     | 0.011  | 0.06   | 0.17  | 93    | 0.869 |       |
|                                       |                           | Hom                                  | 22     | -0.009 | 0.11   |       |       |       |       |
|                                       | <b><i>Core sample</i></b> |                                      |        |        |        |       |       |       |       |
|                                       | Pleasantness              | Het                                  | 61     | 0.027  | 0.07   | 0.65  | 79    | 0.520 |       |
|                                       |                           | Hom                                  | 20     | -0.064 | 0.14   |       |       |       |       |
|                                       | Intensity                 | Het                                  | 61     | -0.005 | 0.06   | -1.36 | 79    | 0.177 |       |
|                                       |                           | Hom                                  | 20     | 0.177  | 0.13   |       |       |       |       |
|                                       | Desirability              | Het                                  | 61     | 0.035  | 0.07   | 0.76  | 79    | 0.451 |       |
|                                       |                           | Hom                                  | 20     | -0.072 | 0.14   |       |       |       |       |
|                                       | Second                    | <b><i>Non-users: all ratings</i></b> |        |        |        |       |       |       |       |
|                                       |                           | Pleasantness                         | Het    | 70     | 0.043  | 0.07  | 1.57  | 89    | 0.121 |
|                                       |                           |                                      | Hom    | 21     | -0.208 | 0.18  |       |       |       |
|                                       |                           | Intensity                            | Het    | 70     | 0.061  | 0.08  | -1.09 | 89    | 0.278 |
| Hom                                   |                           |                                      | 21     | 0.237  | 0.14   |       |       |       |       |
| Desirability                          |                           | Het                                  | 70     | 0.044  | 0.06   | 1.62  | 89    | 0.110 |       |
|                                       |                           | Hom                                  | 21     | -0.192 | 0.17   |       |       |       |       |
| <b><i>Non-users: core sample</i></b>  |                           |                                      |        |        |        |       |       |       |       |
| Pleasantness                          |                           | Het                                  | 58     | 0.007  | 0.08   | 0.87  | 76    | 0.386 |       |
|                                       |                           | Hom                                  | 20     | -0.149 | 0.19   |       |       |       |       |
| Intensity                             |                           | Het                                  | 58     | -0.012 | 0.09   | -0.99 | 76    | 0.326 |       |
|                                       |                           | Hom                                  | 20     | 0.166  | 0.17   |       |       |       |       |
| Desirability                          |                           | Het                                  | 58     | 0.033  | 0.08   | 0.76  | 76    | 0.450 |       |
|                                       |                           | Hom                                  | 20     | -0.097 | 0.19   |       |       |       |       |
| <b><i>Pill users: all ratings</i></b> |                           |                                      |        |        |        |       |       |       |       |
| Pleasantness                          |                           | Het                                  | 66     | 0.087  | 0.09   | 1.01  | 80    | 0.315 |       |
|                                       |                           | Hom                                  | 16     | -0.104 | 0.15   |       |       |       |       |
| Intensity                             |                           | Het                                  | 66     | 0.077  | 0.08   | 1.55  | 80    | 0.125 |       |
|                                       |                           | Hom                                  | 16     | -0.201 | 0.17   |       |       |       |       |
| Desirability                          |                           | Het                                  | 66     | 0.063  | 0.09   | 1.12  | 80    | 0.267 |       |
|                                       |                           | Hom                                  | 16     | -0.151 | 0.15   |       |       |       |       |
| <b><i>Pill users: core sample</i></b> |                           |                                      |        |        |        |       |       |       |       |
| Pleasantness                          |                           | Het                                  | 47     | -0.108 | 0.10   | -1.00 | 58    | 0.322 |       |
|                                       |                           | Hom                                  | 13     | 0.115  | 0.21   |       |       |       |       |
| Intensity                             | Het                       | 47                                   | -0.112 | 0.10   | 0.62   | 58    | 0.536 |       |       |
|                                       | Hom                       | 13                                   | -0.253 | 0.21   |        |       |       |       |       |
| Desirability                          | Het                       | 47                                   | -0.056 | 0.10   | -0.77  | 58    | 0.446 |       |       |
|                                       | Hom                       | 13                                   | 0.108  | 0.20   |        |       |       |       |       |

**Table S6. Frequency of women’s memory associations between the odours of partners (current or previous) or relatives and either MHC-similar or dissimilar odours presented in the experiment.** Frequencies are tested using two-tailed Fisher’s exact tests (after Wedekind et al. 1995).

| <b>Sample</b>    | <b>Session</b> | <b>Association</b> | <b>MHC-similar</b> | <b>MHC-dissimilar</b> | <b>p</b> |
|------------------|----------------|--------------------|--------------------|-----------------------|----------|
| All              | 1              | (Ex-)Partner       | 28/331             | 30/329                | 0.785    |
|                  |                | Relative           | 13/331             | 19/329                | 0.283    |
| Core             | 1              | (Ex-)Partner       | 16/229             | 14/217                | 0.852    |
|                  |                | Relative           | 8/229              | 14/217                | 0.190    |
| All, non-users   | 2              | (Ex-)Partner       | 15/175             | 12/179                | 0.552    |
|                  |                | Relative           | 6/175              | 6/179                 | 1.0      |
| All, pill-users  | 2              | (Ex-)Partner       | 7/121              | 11/118                | 0.335    |
|                  |                | Relative           | 3/121              | 7/118                 | 0.212    |
| Core, non-users  | 2              | (Ex-)Partner       | 11/127             | 8/129                 | 0.484    |
|                  |                | Relative           | 5/127              | 2/129                 | 0.279    |
| Core, pill-users | 2              | (Ex-)Partner       | 4/88               | 8/86                  | 0.246    |
|                  |                | Relative           | 1/88               | 6/86                  | 0.063    |

### Figure S1. Repeatability of scoring for odour pleasantness

Histograms are frequency distributions of Spearman rank correlation coefficients calculated for scores awarded to six shirts by individual raters, either within test sessions (inter-session interval: approximately 1h) or between test sessions (inter-session interval: approximately 3 months). Scores are repeatable for each comparison except for pill users between sessions.

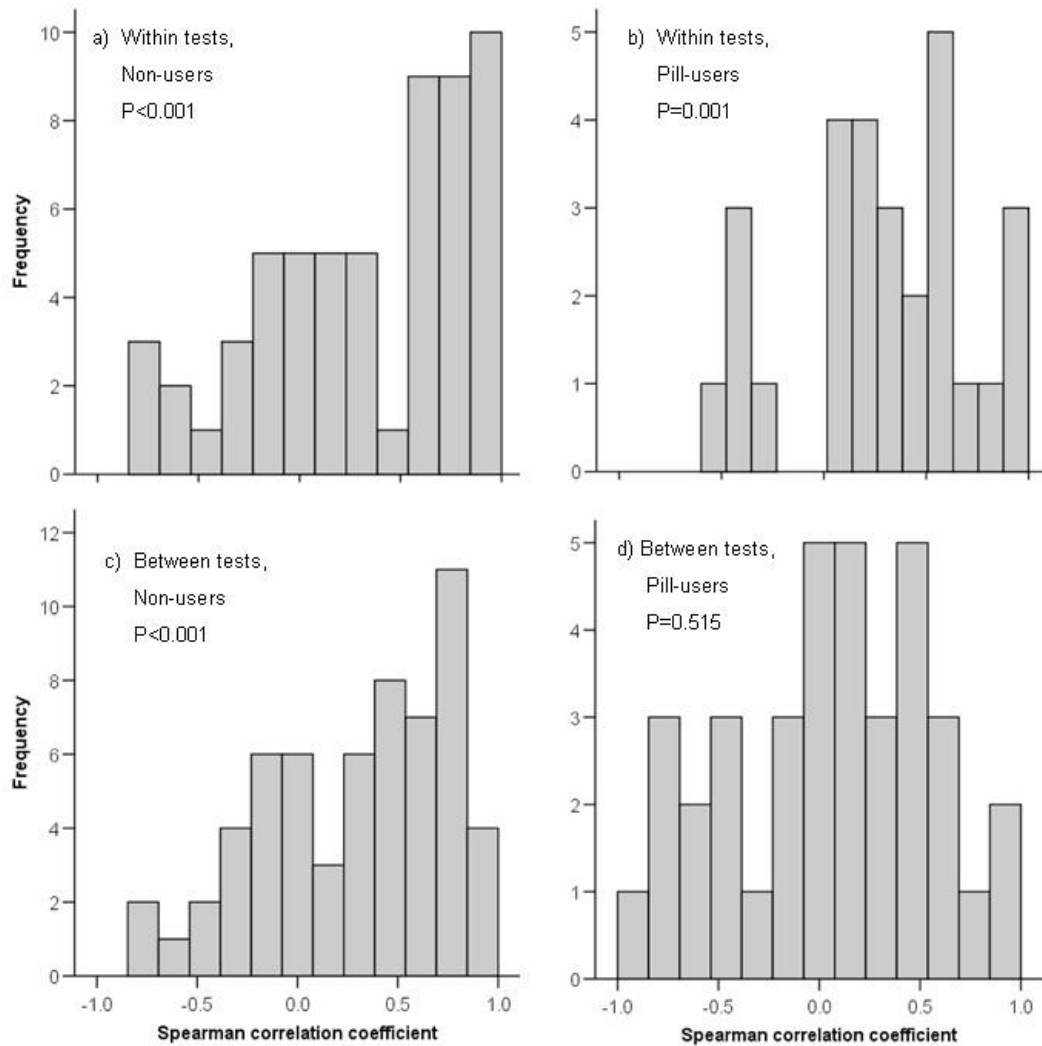



**Figure S2. Repeatability of scoring for odour intensity and partnership desirability.**

Histograms are frequency distributions of Spearman rank correlation coefficients calculated for scores awarded to six shirts by individual raters, either within test sessions (inter-session interval: approximately 1h) or between sessions (inter-session interval: approximately 3 months). Left-hand column= non-users; right-hand column= pill-users. Statistics are one-tailed *t*-tests against chance value of zero.

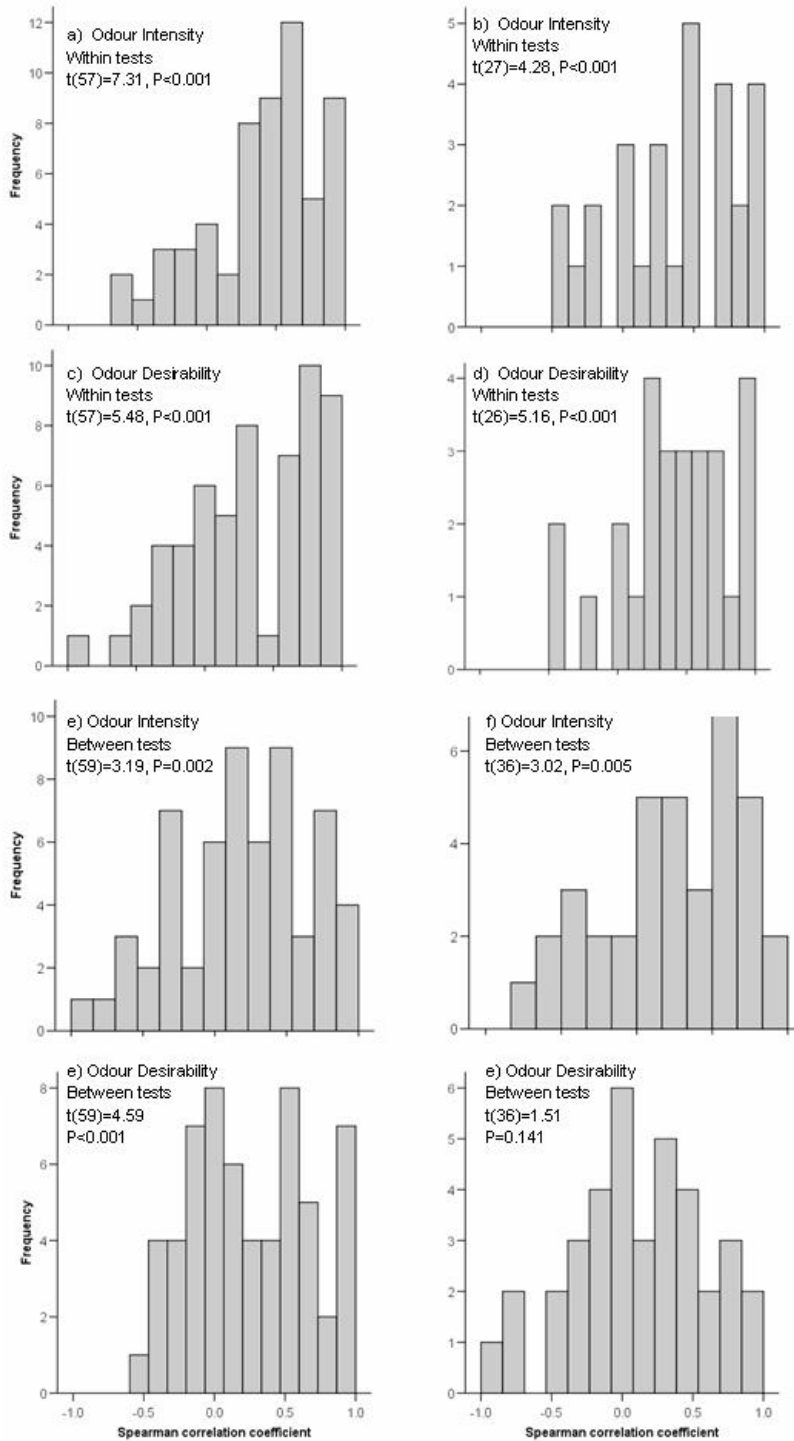

Supplement: rspb20080825s03.pdf [file rspb20080825s03.pdf]
